# Supplementary material for: Complement classical and alternative pathway activation contributes to diabetic kidney disease progression: a glomerular proteomics on kidney biopsies
Source: PubMed Central journal article supplement — Sci Rep. 2025 Jan 2;15:495. doi: 10.1038/s41598-024-84900-4 (PMC11698715; doi:10.1038/s41598-024-84900-4), 2025-01-02
Supplement: 41598_2024_84900_MOESM1_ESM.pdf [file 41598_2024_84900_MOESM1_ESM.pdf]

## **Complement Classical and Alternative Pathway Activation Contributes to Diabetic Kidney Disease**

### **Progression: A Glomerular Proteomics on Kidney Biopsies**

Yang Yang<sup>1</sup>, Ying Zhang<sup>1</sup>, Yuan Li<sup>1</sup>, Xinjin Zhou<sup>2</sup>, Kazuho Honda<sup>3</sup>, Dedong Kang<sup>3</sup>, Muxi Wang<sup>4</sup>, Jing-Hua Yang<sup>5</sup>, Zongping Xia<sup>5</sup>, Yuan Wei<sup>1</sup>, Lu Liu<sup>1</sup>, Ruimin Hu<sup>1</sup>, Takashi Takaki<sup>3</sup> & Guolan Xing<sup>1\*</sup>

#### **Supplementary Material Contents**

**Table S1.** Complement lectin pathway proteins in the glomerular proteome of DKD patients and normal controls.

**Table S2.** Clinical and pathologic characteristics of the validation cohort.

**Table S3.** Immunohistochemical scores of complement proteins in glomeruli of DKD patients and normal controls.

**Table S1.** Complement lectin pathway proteins in the glomerular proteome of DKD patients and normal controls

| Protein Description                              | Accession | Abundance in controls | Abundance in DKD | Abundance in DKD of each class |              |               |              |
|--------------------------------------------------|-----------|-----------------------|------------------|--------------------------------|--------------|---------------|--------------|
|                                                  |           |                       |                  | Class I DKD                    | Class II DKD | Class III DKD | Class IV DKD |
| Mannose-binding protein C (MBL)                  | P11226    | 0                     | 0.6              | 0                              | 0.2          | 0.5           | 1.3          |
| Collectin-10                                     | Q9Y6Z7    | 0                     | 0                | 0                              | 0            | 0             | 0            |
| Collectin-11                                     | Q9BWP8    | 0                     | 0.2              | 0                              | 0.1          | 0.4           | 0.1          |
| Ficolin-1                                        | O00602    | 0                     | 0                | 0                              | 0            | 0             | 0            |
| Ficolin-2                                        | Q15485-1  | 0                     | 1.3              | 0                              | 1.9          | 1.9           | 0.5          |
| Ficolin-3                                        | O75636-1  | 0                     | 12.1             | 3.5                            | 8.9          | 14.9          | 15.4         |
| Mannan-binding lectin serine protease 1 (MASP-1) | P48740-1  | 0                     | 0                | 0                              | 0            | 0             | 0            |
| Mannan-binding lectin serine protease 2 (MASP-2) | O00187-1  | 0                     | 1.0              | 0                              | 0.9          | 1.1           | 1.3          |
| Mannan-binding lectin serine protease 3 (MASP-3) | N/A       | N/A                   | N/A              | N/A                            | N/A          | N/A           | N/A          |
| MBL-associated protein 19 (Map19)                | N/A       | N/A                   | N/A              | N/A                            | N/A          | N/A           | N/A          |
| MBL-associated protein 44 (Map44)                | N/A       | N/A                   | N/A              | N/A                            | N/A          | N/A           | N/A          |

MASP-3 and MAp44 are splice products of the *MASP-1* gene. Map19 are generated by alternative splicing of the *MASP-2* gene. The abundances of their peptides are included in the MASP-1 and MASP-2 proteins in spectral analysis respectively. MASP-3, Map19 and Map 44 are not yet included in the Uniport database and therefore do not have protein accessions. MBL, mannose-binding lectin; MASP, MBL-associated serine protease; N/A, Not Available.

**Table S2.** Clinical and pathologic characteristics of the validation cohort

|                                                   | DKD ( <i>n</i> =20) |
|---------------------------------------------------|---------------------|
| Age (years), mean $\pm$ SD                        | 53.35 $\pm$ 8.95    |
| Gender (male/female)                              | 12/8                |
| Diabetes duration (years), median (IQR)           | 10 (8,20)           |
| History of hypertension, <i>n</i> (%)             | 18 (90%)            |
| Fasting plasma glucose (mg/dl), mean $\pm$ SD     | 177 $\pm$ 49.34     |
| Glycated hemoglobin (HbA1c), mean $\pm$ SD        | (7.02 $\pm$ 1.34) % |
| SCr ( $\mu$ mol/L), mean $\pm$ SD                 | 226.25 $\pm$ 136.42 |
| eGFR (ml/min/1.73 m <sup>2</sup> ), mean $\pm$ SD | 41.9 $\pm$ 11.38    |
| Proteinuria (g/24h), mean $\pm$ SD                | 4.67 $\pm$ 2.82     |
| Hematuria, <i>n</i> (%)                           | 1 (5%)              |
| Serum C3 (g/L), mean $\pm$ SD                     | 1.21 $\pm$ 0.29     |
| Glomerular class (I/II/III/IV), <i>n</i>          | 5/5/5/5             |
| IFTA score (0/1/2/3), <i>n</i>                    | 0/5/4/11            |

SD, standard deviation; IQR, interquartile range; SCr, serum creatinine; eGFR, estimated glomerular filtration rate; C3, complement 3; IFTA, interstitial fibrosis and tubular atrophy.

**Table S3.** Immunohistochemical scores of complement proteins in glomeruli of DKD patients and normal controls.

|    | Group   | Glomeruli number ( <i>n</i> ) | Glomerular immunohistochemical scores |    |    |       |     |     |     |      |
|----|---------|-------------------------------|---------------------------------------|----|----|-------|-----|-----|-----|------|
|    |         |                               | C1q                                   | C3 | C4 | C5b-9 | CFB | CFH | MBL | MASP |
| 1  | NC      | 28                            | 0                                     | 0  | 0  | 0     | 0   | 0   | 0   | 0    |
| 2  | NC      | 31                            | 0                                     | 0  | 0  | 0     | 0   | 0   | 0   | 0    |
| 3  | NC      | 22                            | 0                                     | 0  | 0  | 0     | 0   | 0   | 0   | 0    |
| 4  | DKD I   | 14                            | 0                                     | 0  | 1  | 1     | 0   | 0   | 0   | 0    |
| 5  | DKD I   | 23                            | 0                                     | 1  | 0  | 0     | 0   | 0   | 0   | 0    |
| 6  | DKD I   | 12                            | 0                                     | 0  | 0  | 0     | 0   | 0   | 0   | 0    |
| 7  | DKD I   | 16                            | 1                                     | 2  | 1  | 2     | 0   | 1   | 0   | 0    |
| 8  | DKD I   | 24                            | 0                                     | 1  | 0  | 0     | 0   | 1   | 0   | 0    |
| 9  | DKD II  | 14                            | 0                                     | 1  | 1  | 1     | 1   | 1   | 0   | 0    |
| 10 | DKD II  | 15                            | 0                                     | 1  | 1  | 2     | 0   | 1   | 0   | 0    |
| 11 | DKD II  | 26                            | 0                                     | 2  | 2  | 1     | 0   | 0   | 0   | 0    |
| 12 | DKD II  | 12                            | 1                                     | 3  | 1  | 2     | 1   | 1   | 0   | 0    |
| 13 | DKD II  | 17                            | 0                                     | 3  | 2  | 2     | 1   | 2   | 0   | 0    |
| 14 | DKD III | 18                            | 1                                     | 3  | 2  | 3     | 2   | 1   | 0   | 0    |
| 15 | DKD III | 21                            | 3                                     | 3  | 3  | 2     | 2   | 1   | 0   | 0    |
| 16 | DKD III | 15                            | 1                                     | 2  | 3  | 2     | 1   | 2   | 0   | 0    |
| 17 | DKD III | 24                            | 1                                     | 3  | 2  | 1     | 1   | 1   | 0   | 0    |
| 18 | DKD III | 18                            | 1                                     | 2  | 2  | 2     | 1   | 1   | 0   | 0    |
| 19 | DKD IV  | 17                            | 1                                     | 2  | 2  | 2     | 2   | 2   | 0   | 0    |
| 20 | DKD IV  | 16                            | 1                                     | 3  | 3  | 2     | 1   | 1   | 0   | 0    |
| 21 | DKD IV  | 12                            | 1                                     | 2  | 3  | 3     | 1   | 1   | 0   | 0    |
| 22 | DKD IV  | 18                            | 2                                     | 3  | 3  | 2     | 2   | 2   | 0   | 0    |
| 23 | DKD IV  | 13                            | 2                                     | 2  | 3  | 3     | 1   | 3   | 0   | 0    |

The extent of glomerular staining for complement proteins was evaluated at  $\times 400$  magnification and scored semiquantitatively as follows: 0, no staining; 1, weak and spotty intraglomerular staining; 2, moderate and segmental intraglomerular staining; and 3, strong and diffuse intraglomerular staining. NC, normal controls; DKD, diabetic kidney disease; IHC, immunohistochemistry.
